# Supplementary material for: Impact of Inhaled Corticosteroids on Growth in Children with Asthma: Systematic Review and Meta-Analysis
Source: PubMed Central journal article supplement (PMC4507851; doi:10.1371/journal.pone.0133428), 2015-07-20

**Figure 1. Flow Diagram of Study Selection**

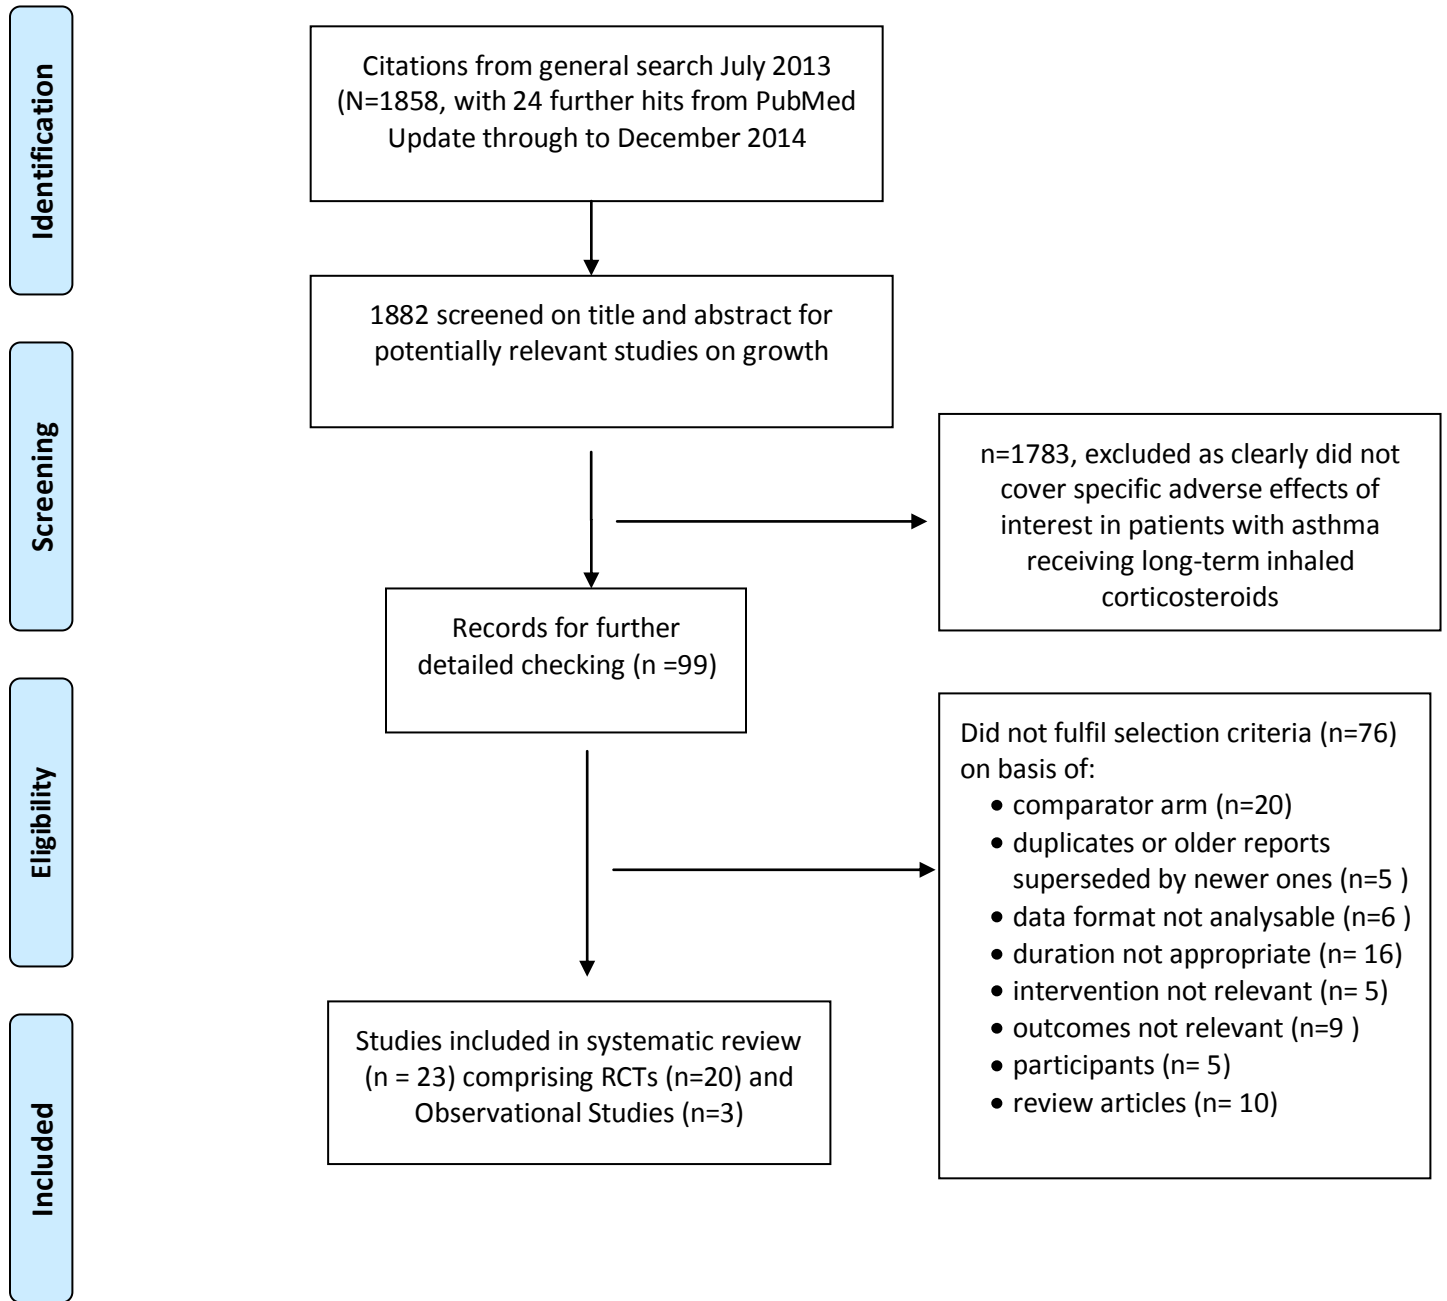

Supplement: pone.0133428.s002.pdf [file pone.0133428.s002.pdf]
